# Supplementary material
Source: PubMed Central journal article supplement (PMC2082967)
Supplement: archdisch_91_11_885__1.pdf [file archdisch_91_11_885__1.pdf]

**Table 6 for E-journal inclusion :****Association between all clinical correlates and CT results.**

| <b>Finding</b>              | <b>Total (%)</b>  | <b>Negative<br/>CT scan (%)</b> | <b>Positive<br/>CT scan (%)</b> | <b>P-value</b> |
|-----------------------------|-------------------|---------------------------------|---------------------------------|----------------|
|                             | <b>(N=22,772)</b> | <b>(N=22,491)</b>               | <b>(N=281)</b>                  |                |
| <b>Age</b>                  |                   |                                 |                                 |                |
| 0-6mths                     | 852 (3.8)         | 841 (3.8)                       | 11 (3.9)                        |                |
| 6mths – 1 year              | 1600 (7.1)        | 1589 (7.1)                      | 11 (3.9)                        |                |
| 1 year – 2 years            | 3777 (17)         | 3758 (17)                       | 19 (6.8)                        |                |
| 2 years – 5 years           | 6492 (29)         | 6468 (29)                       | 24 (9)                          |                |
| 5 years–11 years            | 6577 (29)         | 6473 (29)                       | 104 (37)                        |                |
| 11 years-16years            | 3340 (15)         | 3228 (14)                       | 112 (40)                        | P<0.001        |
| Missing                     | 134 (0.6)         |                                 |                                 |                |
| <b>Sex</b>                  |                   |                                 |                                 |                |
| Male                        | 14767 (65)        | 14568 (65)                      | 199 (71)                        |                |
| Female                      | 7941 (35)         | 7859 (35)                       | 82 (29)                         | P=0.024        |
| Missing                     | 64 (0.3)          |                                 |                                 |                |
| <b>Hours since incident</b> |                   |                                 |                                 |                |
| 0-3hrs                      | 14937 (76)        | 14705 (76)                      | 232 (86)                        |                |
| 3-6hrs                      | 2984 (15)         | 2977 (15)                       | 7 (2.6)                         |                |
| 6-12hrs                     | 591 (3)           | 582 (3)                         | 9 (3.3)                         |                |
| 12-24hrs                    | 511 (2.6)         | 501 (2.6)                       | 10 (3.7)                        |                |
| 24-48hrs                    | 307 (1.6)         | 305 (1.6)                       | 2 (0.7)                         |                |
| >48hrs                      | 290 (1.5)         | 280 (1.4)                       | 10 (3.7)                        | P<0.001        |
| Missing                     | 3152 (14)         |                                 |                                 |                |
| <b>Type of accident</b>     |                   |                                 |                                 |                |
| RTA occupant                | 189 (0.8)         | 175 (0.8)                       | 14 (5.0)                        | P<0.001        |
| RTA cyclist                 | 786 (3.5)         | 743 (3.3)                       | 43 (15)                         | P<0.001        |
| RTA pedestrian              | 372 (1.6)         | 293 (1.3)                       | 79 (28)                         | P<0.001        |
| Any type of RTA             | 1347 (5.9)        | 1211(5.4)                       | 136 (48)                        | P<0.001        |
| Fall from a height          | 4506 (20)         | 4451 (20)                       | 55 (20)                         | P=0.994        |
| 0-1m                        | 2230 (9.8)        | 2226 (9.9)                      | 4 (1.4)                         | P<0.001        |
| 1-2m                        | 1809 (7.9)        | 1797 (8.0)                      | 12 (4.3)                        | P=0.024        |
| 2-3m                        | 330 (1.4)         | 317 (1.4)                       | 13 (4.6)                        | P<0.001        |
| >3m                         | 124 (0.5)         | 98 (0.4)                        | 26 (9.3)                        | P<0.001        |
| Slip/Trip/Fall              | 12058 (53)        | 12025 (54)                      | 33 (12)                         | P<0.001        |
| Hit by projectile/object    | 2361 (10)         | 2328 (10)                       | 33 (12)                         | P=0.435        |
| Assault                     | 933 (4)           | 923 (4)                         | 10 (3.6)                        | P=0.763        |
| Other mechanism             | 1525 (6.7)        | 1512 (6.7)                      | 13 (4.6)                        | P=0.191        |
| Fall down stairs            | 1202 (5.3)        | 1194 (5.3)                      | 8 (2.8)                         | P=0.079        |
| Child dropped               | 398 (1.7)         | 390 (1.7)                       | 8 (2.8)                         | P=0.163        |
| <b>Speed of injury</b>      |                   |                                 |                                 |                |
| Slow                        | 14345 (63)        | 14306 (64)                      | 39 (14)                         |                |
| Medium                      | 6815 (30)         | 6729 (30)                       | 86 (32)                         |                |

|                                   |            |            |           |         |
|-----------------------------------|------------|------------|-----------|---------|
| Fast                              | 1455 (6.4) | 1307 (5.8) | 148 (54)  | P<0.001 |
| Missing                           | 157 (0.7)  |            |           |         |
| Other death at incident           | 10 (0.1)   | 5 (0.1)    | 5 (1.8)   | P<0.001 |
| Unwitnessed injury                | 936 (4.1)  | 886 (3.9)  | 50 (18)   | P<0.001 |
| <b>Agent</b>                      |            |            |           |         |
| Broad/Hard                        | 11652 (52) | 11451 (51) | 201 (74)  |         |
| Broad/Soft                        | 2478 (11)  | 2463 (11)  | 15 (5.5)  |         |
| Localised/Hard                    | 8124 (36)  | 8067 (36)  | 57 (21)   |         |
| Localised/Soft                    | 391 (1.7)  | 391 (1.7)  | 0 (0)     | P<0.001 |
| Missing                           | 127 (0.6)  |            |           |         |
| <b>Loss of Consciousness</b>      |            |            |           |         |
| Any LOC                           | 1185 (5.2) | 1041 (4.6) | 144 (51)  | P<0.001 |
| LOC >1min                         | 524 (2.3)  | 400 (1.8)  | 124 (44)  | P<0.001 |
| LOC>5mins                         | 213 (0.9)  | 118 (0.5)  | 95 (34)   | P<0.001 |
| Any amnesia                       | 720 (3.2)  | 651 (2.9)  | 69 (25)   | P<0.001 |
| <b>Amnesia</b>                    |            |            |           |         |
| Amnesia>1min                      | 488 (2.1)  | 419 (1.9)  | 69 (25)   | P<0.001 |
| Amnesia >5mins                    | 288 (1.3)  | 226 (1.0)  | 62 (22)   | P<0.001 |
| Any LOC or amnesia                | 1502 (6.6) | 1340 (6.0) | 162 (58)  | P<0.001 |
| LOC or Amnesia >5mins             | 418 (1.8)  | 291 (1.3)  | 125 (45)  | P<0.001 |
| <b>Vomiting</b>                   |            |            |           |         |
| Any vomiting                      | 2498 (11)  | 2383 (10)  | 115 (41)  | P<0.001 |
| Vomiting 2 or more times          | 1418 (6.2) | 1336 (5.9) | 82 (29)   | P<0.001 |
| Vomiting 3 or more times          | 857 (3.8)  | 801 (3.6)  | 56 (20)   | P<0.001 |
| <b>Headache</b>                   |            |            |           |         |
| Headache Mild                     | 3972 (19)  | 3960 (19)  | 12 (5.0)  |         |
| Headache Moderate                 | 716 (3.4)  | 688 (3.3)  | 28 (12)   |         |
| Headache Severe                   | 95 (0.4)   | 78 (0.4)   | 17 (7.1)  | P<0.001 |
| <b>Symptoms</b>                   |            |            |           |         |
| Vertigo/Dizziness                 | 644 (2.8)  | 630 (2.8)  | 14 (5.0)  | P=0.043 |
| Drowsiness                        | 949 (4.2)  | 889 (4.0)  | 60 (21)   | P<0.001 |
| Nausea/not feeding                | 615 (2.7)  | 601 (2.7)  | 14 (5.0)  | P=0.025 |
| Hearing loss                      | 23 (0.1)   | 22 (0.1)   | 1 (0.4)   | P=0.249 |
| Visual symptoms                   | 242 (1.1)  | 238 (1.1)  | 4 (1.4)   | P=0.547 |
| Disorientation/Abnormal Behaviour | 234 (1.0)  | 193 (0.9)  | 41 (15)   | P<0.001 |
| Alcohol or drug intoxication      | 48 (0.2)   | 35 (0.2)   | 13 (4.6)  | P<0.001 |
| Seizure                           | 109 (0.5)  | 81 (0.4)   | 28 (10)   | P<0.001 |
| Difficulty taking history         | 255 (1.1)  | 248 (1.1)  | 7 (2.5)   | P=0.040 |
| <b>Examination</b>                |            |            |           |         |
| Bruising mean (SD)                | 1.3 (1.3)  | 1.3 (1.3)  | 3.5 (1.8) | P<0.001 |
| Swelling mean (SD)                | 1.3(1.4)   | 1.3 (1.4)  | 4.0 (1.7) | P<0.001 |
| Laceration mean (SD)              | 0.9 (1.0)  | 0.9 (1.0)  | 2.7 (1.7) | P<0.001 |

|                                                                                                                     |            |            |          |         |
|---------------------------------------------------------------------------------------------------------------------|------------|------------|----------|---------|
| Bruise/Swelling/Laceration >5cm in under 1 year old                                                                 | 52 (0.2)   | 46 (0.2)   | 6 (2.1)  | P<0.001 |
| <b>Depth of Injury</b>                                                                                              |            |            |          |         |
| Superficial                                                                                                         | 13189 (90) | 13155 (91) | 34 (23)  | P<0.001 |
| Deep injury                                                                                                         | 991 (6.8)  | 964 (6.7)  | 27 (18)  | P<0.001 |
| Injury down to bone                                                                                                 | 430 (2.9)  | 344 (2.4)  | 86 (59)  | P<0.001 |
| <b>Type of Injury</b>                                                                                               |            |            |          |         |
| Facial injury                                                                                                       | 5212 (23)  | 5167 (23)  | 45 (16)  | P=0.006 |
| Frontal injury                                                                                                      | 8291 (36)  | 8200 (37)  | 91 (32)  | P=0.171 |
| Parietal injury                                                                                                     | 2216 (9.7) | 2158 (9.6) | 58 (22)  | P<0.001 |
| Temporal injury                                                                                                     | 1100 (4.8) | 1048 (4.7) | 52 (19)  | P<0.001 |
| Occipital injury                                                                                                    | 3429 (15)  | 3390 (15)  | 39 (14)  | P=0.610 |
| Vertex injury                                                                                                       | 600 (2.6)  | 590 (2.6)  | 10 (3.6) | P=0.343 |
| Suspected penetrating injury                                                                                        | 49 (0.2)   | 38 (0.2)   | 11 (3.9) | P<0.001 |
| Depressed skull fracture                                                                                            | 57 (0.3)   | 18 (0.1)   | 39 (14)  | P<0.001 |
| Tense fontanelle                                                                                                    | 4 (0.1)    | 2 (0.1)    | 2 (0.7)  | P=0.001 |
| Suspect major head injury (penetrating injury, depressed skull fracture, fontanelle)                                | 104 (0.5)  | 58 (0.3)   | 46 (16)  | P<0.001 |
| Blood from ear or nose                                                                                              | 464 (2)    | 402 (1.8)  | 62 (22)  | P<0.001 |
| CSF from ear or nose                                                                                                | 36 (0.2)   | 20 (0.1)   | 16 (5.7) | P<0.001 |
| Serious facial injury                                                                                               | 33 (0.1)   | 22 (0.1)   | 11 (3.9) | P<0.001 |
| Facial crepitus                                                                                                     | 3 (0.1)    | 0          | 3 (1.1)  | P<0.001 |
| Panda eyes                                                                                                          | 38 (0.2)   | 20 (0.1)   | 18 (6.4) | P<0.001 |
| Haemotympanum                                                                                                       | 20 (0.1)   | 11 (0.1)   | 9 (3.2)  | P<0.001 |
| Battle's sign                                                                                                       | 12 (0.1)   | 10 (0.1)   | 2 (0.7)  | P=0.009 |
| Suspect basal skull fracture(blood or CSF/nose/ear, serious facial injury or crepitus, panda eyes or haemotympanum) | 536 (2.4)  | 451 (2.0)  | 85(30)   | P<0.001 |
| Other major trauma                                                                                                  | 126 (0.6)  | 73 (0.3)   | 53 (19)  | P<0.001 |
| Suspect Non-accidental injury                                                                                       | 61 (0.3)   | 41 (0.2)   | 20 (7.1) | P<0.001 |
| No responsible adult available to supervise pt at home                                                              | 8 (0.1)    | 8 (0.1)    | 0        | P=0.905 |
| Child on protection register                                                                                        | 16 (0.1)   | 13 (0.1)   | 3 (1.1)  | P=0.001 |
| Learning disability                                                                                                 | 102 (0.4)  | 98 (0.4)   | 4 (1.4)  | P=0.038 |
| History of neurosurgery                                                                                             | 29 (0.1)   | 27 (0.1)   | 2 (0.7)  | P=0.050 |
| Coagulopathy                                                                                                        | 14 (0.1)   | 14 (0.1)   | 0        | P=0.840 |
| History of Epilepsy                                                                                                 | 50 (0.2)   | 48 (0.2)   | 2 (0.7)  | P=0.127 |
| Other relevant past medical History                                                                                 | 142 (0.6)  | 135 (0.6)  | 7 (2.5)  | P=0.002 |
| <b>Glasgow Coma Score</b>                                                                                           |            |            |          |         |
| GCS<15                                                                                                              | 495 (2.2)  | 339 (1.5)  | 156 (56) | P<0.001 |
| GCS<14                                                                                                              | 266 (1.2)  | 137 (0.6)  | 129 (46) | P<0.001 |
| GCS<13                                                                                                              | 193 (0.8)  | 80 (0.4)   | 113 (40) | P<0.001 |
| GCS<15 if age <1 year                                                                                               | 79(0.3)    | 71 (0.3)   | 8(2.8)   | P<0.001 |

|                                                                                                       |            |            |           |         |
|-------------------------------------------------------------------------------------------------------|------------|------------|-----------|---------|
| Mean GCS score (S.D.)                                                                                 | 15 (0.68)  | 15 (0.38)  | 12 (3.9)  | P<0.001 |
| Mean Eyes GCS (S.D.)                                                                                  | 4.0 (0.21) | 4.0 (0.13) | 3.1 (1.2) | P<0.001 |
| Mean Motor GCS (S.D.)                                                                                 | 6.0 (0.24) | 6.0 (0.14) | 5.0 (1.5) | P<0.001 |
| Mean Voice GCS (S.D.)                                                                                 | 5.0 (0.29) | 5.0 (0.18) | 3.7 (1.6) | P<0.001 |
| Number of pts under 1 with GCS unobtainable                                                           | 189 (7.7)  |            |           |         |
| Number of pts age 1-2 with GCS unobtainable                                                           | 53 (1.4)   |            |           |         |
| Number of pts over 2 years of Age with GCS unobtainable                                               | 39 (0.2)   |            |           |         |
| <b>Focal Neurology</b>                                                                                |            |            |           |         |
| Pupils not equal and reactive                                                                         | 81 (0.4)   | 48 (0.2)   | 33 (12)   | P<0.001 |
| Papilloedema                                                                                          | 12 (0.1)   | 5 (0.1)    | 7 (2.5)   | P<0.001 |
| Nystagmus                                                                                             | 12 (0.1)   | 8 (0.1)    | 4 (1.4)   | P<0.001 |
| Motor weakness                                                                                        | 35 (0.2)   | 20 (0.1)   | 15 (5.3)  | P<0.001 |
| Sensory weakness                                                                                      | 8 (0.1)    | 6 (0.1)    | 2 (0.7)   | P=0.004 |
| Abnormal reflexes                                                                                     | 3 (0.1)    | 3 (0.1)    | 0         | P=1     |
| Abnormal co-ordination                                                                                | 7 (0.1)    | 6 (0.1)    | 1 (0.4)   | P=0.083 |
| Any focal neurology (Pupils, papilloedema, nystagmus, motor, sensory, reflex, coordination weakness ) | 150 (0.7)  | 96 (0.4)   | 54 (19)   | P<0.001 |

Appendix 1

STARD Checklist

| Section and topic           | Item | Describe                                                                                                                                                                                 | Reported on page #                                                                                               |
|-----------------------------|------|------------------------------------------------------------------------------------------------------------------------------------------------------------------------------------------|------------------------------------------------------------------------------------------------------------------|
| TITLE/ABSTRACT/<br>KEYWORDS | 1    | The article as a study on diagnostic accuracy (recommend MeSH heading 'sensitivity and specificity')                                                                                     | Page 33                                                                                                          |
| INTRODUCTION                | 2    | The research question(s), such as estimating diagnostic accuracy or comparing accuracy between tests or across participant groups                                                        | Aim stated on page 5                                                                                             |
| <b>METHODS</b>              |      |                                                                                                                                                                                          |                                                                                                                  |
| <i>Participants</i>         | 3    | The study population: the inclusion and exclusion criteria, setting(s) and location(s) where the data were collected                                                                     | Page 5                                                                                                           |
|                             | 4    | Participant recruitment: was this based on presenting symptoms, results from previous tests, or the fact that the participants had received the index test(s) or the reference standard? | Inclusion criteria stated in Methods page 5                                                                      |
|                             | 5    | Participant sampling: was this a consecutive series of patients defined by selection criteria in (3) and (4)? If not specify how patients were further selected.                         | Consecutive series stated in Methods 5 ( all patients in the North-west recruited                                |
|                             | 6    | Data collection: were the participants identified and data collected before the index test(s) and reference standards were performed (prospective study) or after (retrospective study)? | Proforma details in Methods section page 6                                                                       |
| <i>Reference standard</i>   | 7    | The reference standard and its rationale                                                                                                                                                 | Gold standard for positive and hegative outcome for significant intracranial pathology stated in detail page 6-7 |
| <i>Test methods</i>         | 8    | Technical specification of material and methods involved including how and when measurements were taken, and/or cite references for index test(s) and reference standard                 | Stated pages 5-7                                                                                                 |
|                             | 9    | Definition and rationale for the units, cutoffs and/or categories of the results of the index test(s) and the reference standard                                                         | Definition of Significant intracranial pathology given in methods from page 5                                    |
|                             | 10   | The number, training and expertise of the persons (a) executing and (b) reading the index test(s) and the reference standard                                                             | Positive CT scan as reported by consultant radiologist stated in                                                 |

|                            |    |                                                                                                                                                                                                                                   |                                                                                                                                                         |
|----------------------------|----|-----------------------------------------------------------------------------------------------------------------------------------------------------------------------------------------------------------------------------------|---------------------------------------------------------------------------------------------------------------------------------------------------------|
|                            |    |                                                                                                                                                                                                                                   | page 5 , additional clinican details given in methods                                                                                                   |
|                            | 11 | Whether or not the reader(s) of the index test(s) and reference standard were blind (masked) to the results of the other test(s) and describe any information available to them                                                   | Readers were not blind to the clinical status of the patient but this is clear in the context of the study.                                             |
| <i>Statistical methods</i> | 12 | Methods for calculating measures of diagnostic accuracy or making comparisons, and the statistical methods used to quantify uncertainty (e.g. 95% confidence intervals)                                                           | All statistical tests given in Methods , page 7                                                                                                         |
|                            | 13 | Methods for calculating test reproducibility, if done                                                                                                                                                                             | Methods for Kappa coefficient given from page 7                                                                                                         |
| <b>RESULTS</b>             |    |                                                                                                                                                                                                                                   |                                                                                                                                                         |
| <i>Participants</i>        | 14 | When study was done, including beginning and ending dates of recruitment                                                                                                                                                          | Given in methods page 5                                                                                                                                 |
|                            | 15 | Clinical and demographic characteristics (e.g. age, sex, spectrum of presenting symptom(s), comorbidity, current treatment(s), recruitment center)                                                                                | Given in Table 1                                                                                                                                        |
|                            | 16 | How many participants satisfying the criteria for inclusion did or did not undergo the index test and/or the reference standard; describe why participants failed to receive either test (a flow diagram is strongly recommended) | Our negative outcome measure is a composite measure after multimodal prospective monitoring. And thus all our patients underwent this rigorous process. |
| <i>Reference standard</i>  | 17 | Time interval and any treatment administered between index and reference standard                                                                                                                                                 | Not applicable                                                                                                                                          |
|                            | 18 | Distribution of severity of disease (define criteria) in those with the target condition; describe other diagnoses in participants without the target condition                                                                   | Table 2                                                                                                                                                 |
| <i>Test results</i>        | 19 | A cross tabulation of the results of the index test(s) by the results of the reference standard; for continuous results, the distribution of the test results by the results of the reference standard                            | Given in table 3                                                                                                                                        |
|                            | 20 | Indeterminate results, missing responses and outliers of index test(s) stratified by reference standard result and how they were handled                                                                                          | N/A                                                                                                                                                     |
|                            | 21 | Adverse events of index test(s) and reference standard                                                                                                                                                                            | False negatives discussed page 10-11                                                                                                                    |

|                   |    |                                                                                                                |                                             |
|-------------------|----|----------------------------------------------------------------------------------------------------------------|---------------------------------------------|
| <i>Estimation</i> | 22 | Estimates of diagnostic accuracy and measures of statistical uncertainty (e.g. 95% confidence intervals)       | Table 3                                     |
|                   | 23 | Estimates of variability of diagnostic accuracy between subgroups of participants, readers or centers, if done | Given table 3                               |
|                   | 24 | Measures of test reproducibility, if done                                                                      | Kappa coefficients given in results page 10 |
| DISCUSSION        | 25 | The clinical applicability of the study findings                                                               | Discussed fully                             |
